# Supplementary material for: Effect of cow’s milk with different PUFA n-6: n-3 ratios on performance, serum lipid profile, and blood parameters of grower gilts
Source: PubMed Central journal article supplement (PMC9135250; doi:10.1371/journal.pone.0258629), 2022-05-26
Supplement: pone.0258629.s003.pdf [file pone.0258629.s003.pdf]

**Effect of cow's milk with different PUFA n-6: n-3 ratios on performance, serum lipid profile, and blood parameters of grower gilts.**

Authors: Leriana Garcia Reis<sup>1</sup>, Thiago Henrique da Silva<sup>1</sup>, Márcia Saladini Vieira Salles<sup>2</sup>, André Furugen Cesar Andrade<sup>3</sup>, Simone Maria Massami Kitamura Martins<sup>1</sup>, Paula Lumy Takeuchi<sup>4</sup>, Ana Maria Centola Vidal<sup>5</sup>, Arlindo Saran Netto<sup>1</sup>

Running head: Milk with an altered lipid profile without impair the health

<sup>1</sup>Department of Animal Science, School of Animal Science and Food Engineering, University of São Paulo, Rua Duque de Caxias Norte, 225, 13635-900, Pirassununga, SP, Brazil.

<sup>2</sup>Animal Science Institute, Avenida Bandeirantes, 2419, Ribeirão Preto 14030-640, Brazil

<sup>3</sup>Department of Animal Reproduction, School of Veterinary and Animal Science, University of São Paulo, Avenida Duque de Caxias Norte, 225, Pirassununga 13635-900, Brazil.

<sup>4</sup>Department of Internal Medicine, School of Medicine of Ribeirão Preto, University of São Paulo, Avenida Bandeirantes, 3900, Ribeirão Preto, 14049-900, Brazil.

<sup>5</sup>Department of Veterinary Medicine, School of Animal Science and Food Engineering, University of São Paulo, Rua Duque de Caxias Norte, 225, 13635-900, Pirassununga, SP, Brazil.

Corresponding author: Arlindo Saran Netto. Phone number: +55 19 35654000/+55 19 35654039/+55 19 997270373. Email: saranetto@usp.br

Key words: Fatty acid metabolism, health, hemogram, polyunsaturated fatty acids, supplementation, vegetable oil.

1

**Supplementary material**

2 Table S1. Composition of the experimental diets of cows expressed on dry matter percentage

| Item                           | Treatment <sup>a</sup> |       |       |
|--------------------------------|------------------------|-------|-------|
|                                | CC                     | SO    | LO    |
| <i>Ingredients, %</i>          |                        |       |       |
| Ground corn                    | 30.5                   | 28    | 28    |
| Soybean meal                   | 17                     | 17    | 17    |
| Soybean oil                    | -                      | 2.5   | -     |
| Linseed oil                    | -                      | -     | 2.5   |
| Urea                           | 0.5                    | 0.5   | 0.5   |
| Limestone                      | 0.3                    | 0.3   | 0.3   |
| Dicalcium phosphate            | 0.15                   | 0.15  | 0.15  |
| Salt                           | 0.5                    | 0.5   | 0.5   |
| Mineral complex <sup>b</sup>   | 1.05                   | 1.05  | 1.05  |
| Corn silage                    | 50                     | 50    | 50    |
| <i>Chemical Composition, %</i> |                        |       |       |
| Dry matter                     | 92.01                  | 92.61 | 91.68 |
| Mineral matter                 | 3.38                   | 3.19  | 3.18  |
| Crude protein                  | 16.64                  | 16.15 | 16.24 |
| Neutral detergent fiber        | 29.97                  | 29.48 | 29.42 |
| Acid detergent fiber           | 18.73                  | 18.14 | 17.99 |
| Ether extract                  | 3.49                   | 5.67  | 5.78  |
| Lignin                         | 3.91                   | 3.56  | 3.61  |
| Total carbohydrate             | 75.95                  | 74.01 | 74.18 |
| Non-fiber carbohydrate         | 45.99                  | 44.53 | 44.76 |
| Total digestible nutrients     | 66.77                  | 69.31 | 69.46 |

3 <sup>a</sup>CC = Control; SO = Soybean Oil; LO = Linseed Oil.4 <sup>b</sup> Composition per kilogram of product: Sulfur (S) 80g, Magnesium (Mg) 20g, Potassium (K),

5 20g, Manganese (Mn) 1000mg, Zinc (Zn) 2500 mg, Copper (Cu) 1500 mg, Cobalt (Co) 100mg,

6 Iodine (I) 80 mg, Selenium (Se) 20 mg, Calcium (Ca) 180g, Phosphorus (P) 90 g, Fluor (F)

7 300mg.
